# Supplementary material for: Validated LC-MS/MS Method for the Determination of Scopoletin in Rat Plasma and Its Application to Pharmacokinetic Studies
Source: PubMed Central journal article supplement (PMC6332412; doi:10.3390/molecules201018988), 2015-10-19
Supplement: molecules-20-18988-s001.pdf [file molecules-20-18988-s001.pdf]

## Supplementary Materials

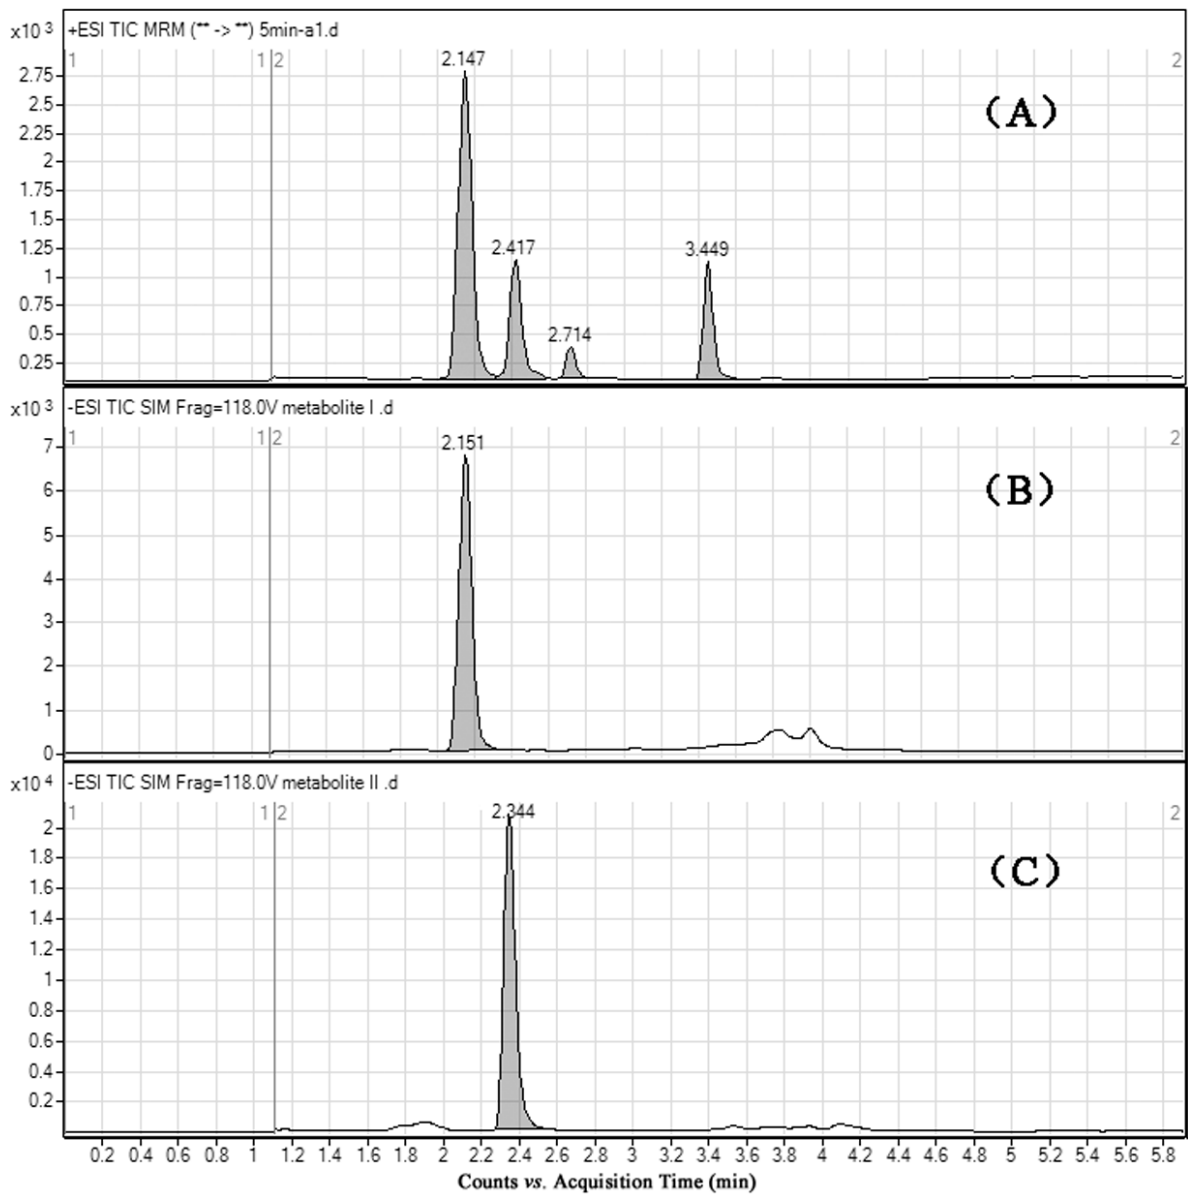

**Figure S1.** Representative chromatograms of scopoletin/metabolites in rat plasma: (A) MRM chromatogram of scopoletin and IS; (B) SIM chromatogram of scopoletin-glucuronide conjugate; (C) SIM chromatogram of scopoletin-sulfate conjugate.
